# Supplementary material for: Somatic Mutations in Circulating Cell-Free DNA and Risk for Hepatocellular Carcinoma in Hispanics
Source: MDPI journal article supplement (doi:10.3390/ijms22147411), 2021-07-10
Supplement: s1 [file s1]

**Supplementary Table S6. List of somatic mutations detected by targeted sequencing in cfDNA in Hispanic study participants with APRI $\geq$ 1.** Ref\_allele: base in the reference genome; Alt\_allele: base altered in the sample; Chr.: chromosome; Exonic func: Function of exonic mutation; SNV: single nucleotide variants; Aaannotation: amino acid change; Tumor\_f: allele frequency; ns-SNV: nonsynonymous SNV; f-deletion: frameshift deletion; nf-deletion: nonframeshift deletion; nf-insertion: nonframeshift insertion; N: number of subjects with mutated gene.

| Gene (N)     | Start_position | Ref_allele | Alt_allele | Chr. | Exonic func | Aaannotation | Tumor_f     |
|--------------|----------------|------------|------------|------|-------------|--------------|-------------|
| KMT2C (3)    | 151859521      | T          | C          | 7    | ns-SNV      | p.K3714R     | 0.47        |
|              | 151932990      | C          | T          | 7    | ns-SNV      | p.R894Q      | 0.05        |
|              | 151970859      | C          | A          | 7    | ns-SNV      | p.G315C      | 0.07        |
| ATM (2)      | 108188136      | G          | A          | 11   | ns-SNV      | p.V2079I     | 0.43 ; 0.50 |
|              | 108190770      | G          | C          | 11   | ns-SNV      | p.S2146T     | 0.49 ; 0.48 |
| BRCA1 (2)    | 41243509       | T          | C          | 17   | ns-SNV      | p.R1347G     | 0.49 ; 0.46 |
| TPRXL (2)    | 14106332       | G          | C          | 3    | ns-SNV      | p.S219T      | 0.15 ; 0.46 |
| MYD88 (2)    | 38181420       | G          | A          | 3    | ns-SNV      | p.A145T      | 0.51 ; 0.5  |
| HLA-F (2)    | 29691687       | A          | G          | 6    | ns-SNV      | p.Y106C      | 0.53 ; 0.53 |
| TET2 (2)     | 106157616      | 0          | -          | 4    | f-deletion  | p.H860fs     | 0.16 ; 0.07 |
| FOXO4 (2)    | 117846         | A          | T          | 9    | ns-SNV      | p.S92T       | 0.42        |
|              | 117873         | C          | T          | 9    | ns-SNV      | p.G83S       | 0.2         |
| MUC21 (2)    | 30954324       | G          | C          | 6    | ns-SNV      | p.E124D      | 0.11        |
|              | 30954845       | A          | G          | 6    | ns-SNV      | p.N298S      | 0.17        |
| NOTCH3 (2)   | 15272337       | 0          | -          | 19   | f-deletion  | p.P2034fs    | 0.06        |
|              | 15311605       | 0          | -          | 19   | f-deletion  | p.A38fs      | 0.05        |
| APC (2)      | 112175253      | 0          | -          | 5    | f-deletion  | p.S1321fs    | 0.43        |
|              | 112175430      | C          | G          | 5    | ns-SNV      | p.T1380S     | 0.04        |
| ASTN1 (1)    | 176903324      | G          | A          | 1    | ns-SNV      | p.R879W      | 0.11        |
| MMEL1 (1)    | 2560821        | G          | C          | 1    | ns-SNV      | p.L35V       | 0.07        |
| C1orf95 (1)  | 226736652      | C          | T          | 1    | ns-SNV      | p.A16V       | 0.18        |
| WHSC1L1 (1)  | 38162945       | G          | A          | 8    | ns-SNV      | p.S754L      | 0.5         |
| NOTCH2NL (1) | 145273354      | T          | C          | 1    | ns-SNV      | p.C70R       | 0.16        |
| RANBP1 (1)   | 20114511       | C          | T          | 22   | ns-SNV      | p.A181V      | 0.52        |
| ROS1 (1)     | 117686261      | C          | T          | 6    | ns-SNV      | p.G1027D     | 0.5         |
| TECPR1 (1)   | 97870222       | C          | T          | 7    | ns-SNV      | p.G292R      | 0.54        |
| JAK2 (1)     | 5126343        | G          | A          | 9    | ns-SNV      | p.R1063H     | 0.48        |
| ERBB3 (1)    | 56495562       | C          | G          | 12   | ns-SNV      | p.T1251S     | 0.51        |
| HSP90AA1 (1) | 102552202      | G          | A          | 14   | ns-SNV      | p.A263V      | 0.42        |
| MAP2K1 (1)   | 66781553       | C          | T          | 15   | ns-SNV      | p.P321S      | 0.49        |
| RBFOX1 (1)   | 6367045        | G          | A          | 16   | ns-SNV      | p.R18Q       | 0.48        |
| JAK3 (1)     | 17943694       | G          | A          | 19   | ns-SNV      | p.R799C      | 0.52        |
| BMP2K (1)    | 79792085       | G          | C          | 4    | ns-SNV      | p.Q460H      | 0.07        |
| KMT2D (1)    | 49434075       | C          | T          | 12   | ns-SNV      | p.G2493E     | 0.57        |
| DICER1 (1)   | 95570180       | C          | T          | 14   | ns-SNV      | p.A1185T     | 0.42        |
| MUC6 (1)     | 1017768        | G          | A          | 11   | ns-SNV      | p.T1678I     | 0.18        |

|             |           |   |               |    |              |                      |      |
|-------------|-----------|---|---------------|----|--------------|----------------------|------|
| RUNX3 (1)   | 25255983  | C | T             | 1  | ns-SNV       | p.R140K              | 0.39 |
| ERBB2 (1)   | 37879585  | A | G             | 17 | ns-SNV       | p.I654V              | 0.46 |
| TGFBR1 (1)  | 101911500 | G | T             | 9  | ns-SNV       | p.W479C              | 0.49 |
| AMER1 (1)   | 63410516  | G | A             | X  | ns-SNV       | p.P884L              | 0.48 |
| PDGFRA (1)  | 55131164  | C | A             | 4  | ns-SNV       | p.A236D              | 0.13 |
| SPEN (1)    | 16257476  | G | T             | 1  | ns-SNV       | p.V1581F             | 0.46 |
| IDH1 (1)    | 209108311 | T | C             | 2  | ns-SNV       | p.M180V              | 0.54 |
| PPP1R3A (1) | 113518529 | T | C             | 7  | ns-SNV       | p.K873R              | 0.49 |
| GNAS (1)    | 57428423  | G | C             | 20 | ns-SNV       | p.G35R               | 0.16 |
|             | 57429413  | G | A             | 20 | ns-SNV       | p.A365T              | 0.43 |
| TP53 (1)    | 7579419   | 0 | -             | 17 | f-deletion   | p.S105fs             | 0.41 |
| ALK (1)     | 29416378  | 0 | -             | 2  | nf-deletion  | p.1525_1525del       | 0.44 |
| ELMSAN1 (1) | 74205941  | - | TGCTG<br>CTGT | 14 | nf-insertion | p.Q257delinsQ<br>QQQ | 0.34 |
| NTRK1 (1)   | 156849112 | 0 | -             | 1  | f-deletion   | p.D668fs             | 0.06 |
| CDC27 (1)   | 45229185  | C | G             | 17 | ns-SNV       | p.G359R              | 0.04 |
