# Supplementary material for: Somatic Mutations in Circulating Cell-Free DNA and Risk for Hepatocellular Carcinoma in Hispanics
Source: MDPI journal article supplement (doi:10.3390/ijms22147411), 2021-07-10
Supplement: s1 [file s1]

**Supplementary Table S2. Comparison between Hispanic HCC participants with detected mutations and those without detectable mutations in cfDNA.** Data are presented as frequency (%) or as or as mean (range) - median. BMI: body mass index; AFP: alpha-fetoprotein.

| <b>Parameters</b>                                  | <b>no mutation (n=5)</b>  | <b>with mutations (n=22)</b> | <b>p</b> |
|----------------------------------------------------|---------------------------|------------------------------|----------|
| <b>Male (n=27)</b>                                 | 4 (80%)                   | 14 (63.6%)                   | 0.636    |
| <b>Age (n=27)</b>                                  | 66.6 (56.0-73.0) - 69.0   | 66.9 (50.0-88.0) - 66.5      | 0.947    |
| <b>BMI (n=25)</b>                                  | 29.8 (24.1-39.3) - 29.0   | 31.6 (23.2-50.7) - 28.5      | 0.663    |
| <b>Obese (BMI <math>\geq 30</math>) (n=25)</b>     | 1 (20%)                   | 9 (45%)                      | 0.615    |
| <b>Diabetes (n=27)</b>                             | 3 (60%)                   | 17 (77.3%)                   |          |
| <b>Family History of Cancer (n=27)</b>             | 3 (60%)                   | 10 (45.5%)                   | 0.648    |
| <b>Tumor Stage (n=27)</b>                          |                           |                              | 0.450    |
| <b>I</b>                                           | 2 (40%)                   | 3 (13.6%)                    |          |
| <b>II</b>                                          | 0 (0%)                    | 4 (18.2%)                    |          |
| <b>III</b>                                         | 1 (20%)                   | 7 (31.8%)                    |          |
| <b>IV</b>                                          | 2 (40%)                   | 8 (36.4%)                    |          |
| <b>Child-Pugh score (n=27)</b>                     |                           |                              | 0.426    |
| <b>A</b>                                           | 3 (60%)                   | 17 (77.3%)                   |          |
| <b>B</b>                                           | 2 (40%)                   | 5 (22.7%)                    |          |
| <b>Multiple tumors (n=27)</b>                      | 3 (60%)                   | 12 (54.5%)                   | >0.999   |
| <b>AFP (ng/ml) (n=26)</b>                          | 630.4 (6.4-2869.0) - 20.4 | 4625.6 (2.8-36000.0) - 99.6  | 0.101    |
| <b>Differentiation (n=17)</b>                      |                           |                              | 0.129    |
| <b>Well</b>                                        | 3 (100%)                  | 5 (35.7%)                    |          |
| <b>Moderate</b>                                    | 0 (0%)                    | 5 (35.7%)                    |          |
| <b>Poor</b>                                        | 0 (0%)                    | 4 (28.6%)                    |          |
| <b>cfDNA concentrations (ng/<math>\mu</math>l)</b> | 0.14 (0.11-0.19) - 0.14   | 0.12 (0.04-0.37) - 0.09      | 0.535    |
