# Supplementary material for: Somatic Mutations in Circulating Cell-Free DNA and Risk for Hepatocellular Carcinoma in Hispanics
Source: MDPI journal article supplement (doi:10.3390/ijms22147411), 2021-07-10
Supplement: s1 [file s1]

**Supplementary Table S3. List of somatic mutations detected by targeted sequencing in cfDNA from Hispanic patients with HCC.** Ref\_allele: base in the reference genome; Alt\_allele: base altered in the sample; Chr.: chromosome; Exonic func: Function of exonic mutation; SNV: single nucleotide variants; Aaannotation: amino acid change; Tumor\_f: allele frequency; ns-SNV: nonsynonymous SNV; f-deletion: frameshift deletion; nf-deletion: nonframeshift deletion; f-insertion: frameshift insertion; N: number of subjects with the mutated gene.

| Gene (N)       | Start_position | Ref_allele | Alt_allele | Chr. | Exonic func | Aaannotation | Tumor_f      |
|----------------|----------------|------------|------------|------|-------------|--------------|--------------|
| TP53 (6)       | 7573982        | C          | A          | 17   | stopgain    | p.E349X      | 0.35         |
|                | 7577121        | G          | A          | 17   | ns-SNV      | p.R273C      | 0.11         |
|                | 7577534        | C          | A          | 17   | ns-SNV      | p.R249S      | 0.31         |
|                | 7578455        | C          | G          | 17   | ns-SNV      | p.A159P      | 0.27         |
|                | 7579525        | TGA        | T          | 17   | f-deletion  | p.F69fs      | 0.38         |
|                | 7577525        | 0          | -          | 17   | nf-deletion | p.252_252del | 0.31         |
| NFE2L2 (3)     | 178097188      | C          | T          | 2    | ns-SNV      | p.D176N      | 0.05         |
|                | 178098800      | T          | A          | 2    | ns-SNV      | p.E82V       | 0.19         |
|                | 178098975      | A          | G          | 2    | ns-SNV      | p.W24R       | 0.24         |
| CTNNB1 (3)     | 41266100       | T          | G          | 3    | ns-SNV      | p.R55S       | 0.15         |
|                | 41266113       | C          | G          | 3    | ns-SNV      | p.R51T       | 0.29         |
|                | 41266124       | A          | G          | 3    | ns-SNV      | p.T41A       | 0.05         |
| KMT2D (2)      | 49427960       | GCA        | G          | 12   | f-deletion  | p.C3543fs    | 0.11         |
|                | 49420661       | G          | A          | 12   | ns-SNV      | p.R5030C     | 0.05         |
|                | 49435116       | G          | A          | 12   | ns-SNV      | p.P2146L     | 0.04         |
| AXIN1 (2)      | 396711         | -          | A          | 16   | f-insertion | p.F105fs     | 0.15         |
|                | 354387         | C          | A          | 16   | stopgain    | p.E391X      | 0.72         |
| KMT2C (2)      | 151873992      | A          | G          | 7    | ns-SNV      | p.V2849A     | 0.09         |
|                | 151921210      | C          | T          | 7    | stopgain    | p.W1071X     | 0.10         |
|                | 151932990      | C          | T          | 7    | ns-SNV      | p.R894Q      | 0.03         |
| BIVM-ERCC5 (2) | 103515036      | G          | T          | 13   | ns-SNV      | p.A967S      | 0.30         |
|                | 103519081      | A          | G          | 13   | ns-SNV      | p.I1261V     | 0.05         |
| AR (2)         | 66765023       | C          | T          | X    | ns-SNV      | p.P12L       | 0.05<br>0.10 |
| MPL (1)        | 43817971       | GC         | G          | 1    | f-deletion  | p.S550fs     | 0.16         |
| CBL (1)        | 119149356      | TATG       | T          | 11   | nf-deletion | p.455_456del | 0.08         |
| RB1 (1)        | 48939048       | 0          | -          | 13   | f-deletion  | p.K294fs     | 0.14         |
| NCOR1 (1)      | 15978938       | 0          | -          | 17   | f-deletion  | p.D1210fs    | 0.45         |
| SRSF2 (1)      | 74732933       | 0          | -          | 17   | f-deletion  | p.R102fs     | 0.26         |
| ARID1A (1)     | 27100375       | C          | T          | 1    | stopgain    | p.Q1363X     | 0.39         |
| JAK1 (1)       | 65335121       | G          | A          | 1    | stopgain    | p.R174X      | 0.07         |
| NTRK1 (1)      | 156830772      | G          | T          | 1    | ns-SNV      | p.A16S       | 0.31         |
| ABL2 (1)       | 179076921      | C          | T          | 1    | ns-SNV      | p.G1161R     | 0.06         |
| PRG4 (1)       | 186276937      | C          | A          | 1    | ns-SNV      | p.P696T      | 0.03         |
| DNMT3A (1)     | 25463247       | C          | T          | 2    | ns-SNV      | p.R749H      | 0.11         |
| SOS1 (1)       | 39249720       | T          | C          | 2    | ns-SNV      | p.M617V      | 0.08         |
| MSH6 (1)       | 48026327       | T          | C          | 2    | ns-SNV      | p.F402S      | 0.07         |
| RAF1 (1)       | 12641730       | C          | T          | 3    | ns-SNV      | p.G304D      | 0.05         |

|             |           |   |   |    |          |          |      |
|-------------|-----------|---|---|----|----------|----------|------|
| TGFB2 (1)   | 30713231  | T | A | 3  | ns-SNV   | p.F211I  | 0.11 |
| MLH1 (1)    | 37067215  | G | T | 3  | ns-SNV   | p.D376Y  | 0.04 |
| MST1 (1)    | 49724902  | C | T | 3  | ns-SNV   | p.R122Q  | 0.08 |
| PBRM1 (1)   | 52582143  | A | G | 3  | ns-SNV   | p.L1669P | 0.12 |
| EPHA3 (1)   | 89390941  | T | C | 3  | ns-SNV   | p.I336T  | 0.15 |
| MAP3K1 (1)  | 56155686  | C | T | 5  | ns-SNV   | p.R260C  | 0.04 |
| CDKAL1 (1)  | 21231086  | G | T | 6  | ns-SNV   | p.R519I  | 0.06 |
| HLA-H (1)   | 29856337  | A | G | 6  | ns-SNV   | p.D148G  | 0.06 |
| STK19 (1)   | 31940022  | C | A | 6  | ns-SNV   | p.A12E   | 0.21 |
| ARID1B (1)  | 157150387 | G | T | 6  | ns-SNV   | p.M523I  | 0.06 |
| PMS2 (1)    | 6042115   | C | T | 7  | ns-SNV   | p.R169H  | 0.08 |
| MET (1)     | 116409799 | C | T | 7  | ns-SNV   | p.T913M  | 0.03 |
| SMO (1)     | 128845146 | G | T | 7  | ns-SNV   | p.G214C  | 0.23 |
| BRAF (1)    | 140476824 | C | A | 7  | ns-SNV   | p.V528F  | 0.45 |
| PAXIP1 (1)  | 154760691 | G | T | 7  | ns-SNV   | p.A407D  | 0.11 |
| FGFR1 (1)   | 38279266  | G | A | 8  | ns-SNV   | p.T288M  | 0.07 |
|             | 38287254  | C | T | 8  | ns-SNV   | p.V135I  | 0.03 |
| NBN (1)     | 90965740  | G | T | 8  | ns-SNV   | p.T526K  | 0.05 |
| IFNA2 (1)   | 21385319  | T | C | 9  | ns-SNV   | p.T4A    | 0.05 |
| NOTCH1 (1)  | 139396752 | G | A | 9  | ns-SNV   | p.P1786S | 0.05 |
|             | 139399828 | C | T | 9  | ns-SNV   | p.S1507N | 0.03 |
| BIRC2 (1)   | 102220619 | G | A | 11 | ns-SNV   | p.G12S   | 0.44 |
| ATM (1)     | 108188108 | G | C | 11 | ns-SNV   | p.Q2069H | 0.04 |
| ARID2 (1)   | 46245613  | C | T | 12 | ns-SNV   | p.P1236L | 0.11 |
| COL2A1 (1)  | 48379599  | C | A | 12 | ns-SNV   | p.G531V  | 0.20 |
| FLT1 (1)    | 28897002  | C | G | 13 | ns-SNV   | p.V960L  | 0.05 |
| NTRK3 (1)   | 88680650  | T | C | 15 | ns-SNV   | p.N203D  | 0.07 |
| TSC2 (1)    | 2112534   | C | T | 16 | stopgain | p.Q432X  | 0.03 |
| ZNF205 (1)  | 3169769   | C | T | 16 | ns-SNV   | p.R370W  | 0.14 |
| CREBBP (1)  | 3779128   | G | A | 16 | ns-SNV   | p.R1974W | 0.08 |
| FOXC2 (1)   | 86601428  | C | G | 16 | ns-SNV   | p.R163G  | 0.06 |
| CDK12 (1)   | 37687087  | C | T | 17 | stopgain | p.R1331X | 0.09 |
| PPM1D (1)   | 58740436  | G | T | 17 | ns-SNV   | p.E447D  | 0.39 |
| RPTOR (1)   | 78899183  | C | T | 17 | ns-SNV   | p.A941V  | 0.05 |
| SETBP1 (1)  | 42531185  | G | A | 18 | ns-SNV   | p.R627H  | 0.07 |
| SMARCA4(1)  | 11134251  | C | T | 19 | ns-SNV   | p.R973W  | 0.03 |
| NOTCH3 (1)  | 15290031  | G | A | 19 | ns-SNV   | p.R1175W | 0.04 |
| JAK3 (1)    | 17945698  | C | T | 19 | ns-SNV   | p.G721D  | 0.11 |
| AKT2 (1)    | 40745771  | C | T | 19 | ns-SNV   | p.G274R  | 0.34 |
| ERCC2 (1)   | 45864989  | C | T | 19 | ns-SNV   | p.A37T   | 0.06 |
| CSNK2A1 (1) | 476415    | A | G | 20 | ns-SNV   | p.M153T  | 0.30 |
| NKX2-2 (1)  | 21492791  | G | A | 20 | ns-SNV   | p.P198S  | 0.06 |
| GNAS (1)    | 57429031  | C | A | 20 | ns-SNV   | p.S237R  | 0.18 |
| CHODL (1)   | 19638292  | T | A | 21 | ns-SNV   | p.S253R  | 0.09 |
| MAPK1 (1)   | 22160227  | C | T | 22 | ns-SNV   | p.R135K  | 0.19 |
| HSCB (1)    | 29138132  | C | T | 22 | ns-SNV   | p.P17S   | 0.12 |
| BCOR (1)    | 39916459  | T | C | X  | ns-SNV   | p.H1515R | 0.06 |
| DDX3X (1)   | 41203670  | T | C | X  | ns-SNV   | p.F332S  | 0.12 |
| AMER1 (1)   | 63412518  | A | T | X  | ns-SNV   | p.F217I  | 0.07 |
| ATRX (1)    | 76907627  | G | A | X  | ns-SNV   | p.R1512C | 0.54 |
