# Supplementary material for: Somatic Mutations in Circulating Cell-Free DNA and Risk for Hepatocellular Carcinoma in Hispanics
Source: MDPI journal article supplement (doi:10.3390/ijms22147411), 2021-07-10
Supplement: s1 [file s1]

**Supplementary Table S4: Demographic and clinical parameters of the 51 Hispanic study participants with APRI $\geq$ 1 and 41 Hispanic study participants with APRI<1.** BMI: body mass index; HbA1c: hemoglobin A1c; HBV: hepatitis B virus; HCV: hepatitis C virus; AST, aspartate aminotransferase; ALT, alanine aminotransferase; FBG, fasting blood glucose; APRI, aspartate aminotransferase-to-platelet ratio index. Data are presented as mean (range) - median or frequency (%).

| Parameters                                              | APRI<1(n=41)                | APRI $\geq$ 1(n=51)        | p      |
|---------------------------------------------------------|-----------------------------|----------------------------|--------|
| <b>APRI (n=92)</b>                                      | 0.4 (0.1-0.9) - 0.4         | 3.0 (1.0-14.2) - 1.8       | <0.001 |
| <b>Male (n=92)</b>                                      | 17 (41.5%)                  | 22 (43.1%)                 | 0.560  |
| <b>Age (n=92)</b>                                       | 50.4 (21.0-72.0) - 54.2     | 51.9 (21.0-83.0) - 52.8    | 0.691  |
| <b>BMI (n=92)</b>                                       | 33.9 (22.6-59.4) - 31.4     | 33.7 (20.3-60.2) - 30.2    | 0.943  |
| <b>Obese (BMI <math>\geq</math>30) (n=92)</b>           | 21 (51.2%)                  | 31 (60.8%)                 | 0.501  |
| <b>HbA1c (%) (n=86)</b>                                 | 5.2 (3.5-8.1) - 5.5         | 6.4 (2.9-14.0) - 5.7       | 0.018  |
| <b>Diabetic groups (n=89)</b>                           |                             |                            | 0.428  |
| <b>Normal</b>                                           | 12 (31.6%)                  | 7 (13.7%)                  |        |
| <b>Prediabetic</b>                                      | 15 (39.5%)                  | 19 (37.3%)                 |        |
| <b>Diabetic</b>                                         | 11 (28.9%)                  | 25 (49.0%)                 |        |
| <b>Waist circumference (cm) (n=92)</b>                  | 110.7 (81.0-153.0) - 105.1  | 112.8 (79.0-151.0) - 105.0 | 0.735  |
| <b>NAFLD score (n=79)</b>                               | -0.6 (-4.8-3.3) - -0.5      | 1.3 (-3.0-4.7) - 1.3       | 0.003  |
| <b>Drinks per week (n=89)</b>                           | 3.0 (0.0-44.0) - 0.0        | 4.7 (0.0-42.8) - 0.0       | 0.572  |
| <b>Drinking status (n=89)</b>                           |                             |                            | 0.550  |
| <b>Never</b>                                            | 27 (65.9%)                  | 36 (75.0%)                 |        |
| <b>Moderate</b>                                         | 12 (29.3%)                  | 7 (14.6%)                  |        |
| <b>Heavy</b>                                            | 2 (4.9%)                    | 5 (10.4%)                  |        |
| <b>Smoking status (n=91)</b>                            |                             |                            | 0.317  |
| <b>Never</b>                                            | 25 (61.0%)                  | 31 (62.0%)                 |        |
| <b>Former</b>                                           | 9 (22.0%)                   | 10 (20.0%)                 |        |
| <b>Current</b>                                          | 7 (17.1%)                   | 9 (18.0%)                  |        |
| <b>Blood tests</b>                                      |                             |                            |        |
| AST (U/L) (n=92)                                        | 30.9 (12.0-69.0) - 29.5     | 90.9 (18.0-289.0) - 72.1   | <0.001 |
| Abnormal AST ( $>33$ U/L) (n=92)                        | 19 (46.3%)                  | 50 (98.0%)                 | <0.001 |
| ALT (U/L) (n=92)                                        | 41.2 (16.0-120.0) - 38.3    | 97.5 (13.0-366.0) - 72.4   | <0.001 |
| Abnormal ALT ( $>40$ U/L male, $>31$ U/L female) (n=92) | 21 (51.2%)                  | 45 (88.2%)                 | 0.008  |
| Albumin (g/dL) (n=82)                                   | 4.2 (3.1-4.8) - 4.1         | 3.7 (2.5-4.5) - 3.8        | <0.001 |
| Alkaline phosphatase (U/L) (n=63)                       | 56.9 (5.0-105.0) - 70.3     | 64.2 (4.0-477.0) - 13.8    | 0.729  |
| FBG (mg/dL) (n=89)                                      | 123.8 (85.0-220.0) - 108.1  | 147.1 (54.0-359.0) - 118.3 | 0.299  |
| Insulin (mU/L) (n=92)                                   | 25.0 (3.5-71.5) - 16.8      | 26.1 (4.2-279.0) - 15.4    | 0.902  |
| Insulin resistance (HOMA) (n=89)                        | 8.2 (1.2-24.7) - 4.6        | 9.6 (1.2-104.7) - 6.0      | 0.634  |
| Platelet counts ( $\times 10^9$ /L) (n=92)              | 228.2 (161.0-362.0) - 224.4 | 139.9 (10.0-292.0) - 141.3 | <0.001 |
