# Supplementary material for: Somatic Mutations in Circulating Cell-Free DNA and Risk for Hepatocellular Carcinoma in Hispanics
Source: MDPI journal article supplement (doi:10.3390/ijms22147411), 2021-07-10
Supplement: s1 [file s1]

**Supplementary Table S1: Demographic and clinical parameters of the 27 Hispanic study participants with HCC.** Data are presented as frequency (%) or as mean (range) - median. BMI: body mass index; AFP: alpha-fetoprotein.

| <b>Parameters</b>                       |                             |
|-----------------------------------------|-----------------------------|
| <b>Male (n=27)</b>                      | 18 (66.7%)                  |
| <b>Age (n=27)</b>                       | 66.9 (50.0-88.0) - 68.0     |
| <b>BMI (n=25)</b>                       | 31.2 (23.2-50.7) - 29.0     |
| <b>Obese (BMI <math>\geq 30</math>)</b> | 10 (40%)                    |
| <b>Diabetes (n=27)</b>                  | 20 (74.1%)                  |
| <b>Family History of Cancer (n=27)</b>  | 13 (48.1%)                  |
| <b>Stage (n=27)</b>                     |                             |
| <b>I</b>                                | 5 (18.5%)                   |
| <b>II</b>                               | 4 (14.8%)                   |
| <b>III</b>                              | 8 (29.6%)                   |
| <b>IV</b>                               | 10 (37.0%)                  |
| <b>Child-Pugh Score (n=27)</b>          |                             |
| <b>A</b>                                | 20 (74.1%)                  |
| <b>B</b>                                | 7 (25.9%)                   |
| <b>Multiple tumors (n=25)</b>           | 15 (55.6%)                  |
| <b>AFP (n=26)</b>                       | 3857.2 (2.8-36000.0) - 89.8 |
| <b>Differentiation (n=17)</b>           |                             |
| <b>Well</b>                             | 8 (47.1%)                   |
| <b>Moderate</b>                         | 5 (29.4%)                   |
| <b>Poor</b>                             | 4 (23.5%)                   |
