# Supplementary material for: Somatic Mutations in Circulating Cell-Free DNA and Risk for Hepatocellular Carcinoma in Hispanics
Source: MDPI journal article supplement (doi:10.3390/ijms22147411), 2021-07-10
Supplement: s1 [file s1]

**Supplementary Table S5. Comparison between the Hispanic subjects with advanced liver fibrosis/cirrhosis with detected mutations and those without detectable mutations.** Data are presented as mean (range) - median or frequency (%). BMI: body mass index; HbA1c: hemoglobin A1c; AST: aspartate aminotransferase; ALT: alanine aminotransferase; FBG: fasting blood glucose; NFS: NAFLD fibrosis score

| <b>Parameters</b>                           | <b>no mutation (n=34)</b>  | <b>with mutations (n=17)</b> | <b>p</b> |
|---------------------------------------------|----------------------------|------------------------------|----------|
| <b>APRI</b>                                 | 3.6 (1.0-14.2) - 1.6       | 1.8 (1.0-4.2) - 1.7          | 0.052    |
| <b>Male</b>                                 | 12 (35.3%)                 | 10 (58.8%)                   | 0.144    |
| <b>Age</b>                                  | 54.1 (23-72) - 56.1        | 46.9 (21-83) - 41.4          | 0.165    |
| <b>BMI</b>                                  | 31.6 (24.8-60.2) - 29.4    | 38.4 (20.3-55.6) - 38.1      | 0.084    |
| <b>Obese (BMI ≥30)</b>                      | 20 (58.8%)                 | 11 (64.7%)                   | 0.075    |
| <b>HbA1c (%)</b>                            | 6.4 (3.3-14.0) - 5.8       | 6.4 (2.9-13.1) - 5.2         | 0.998    |
| <b>Diabetic groups</b>                      |                            |                              | 0.567    |
| Normal                                      | 5 (14.7%)                  | 2 (11.8%)                    |          |
| Prediabetic                                 | 11 (32.4%)                 | 8 (47.1%)                    |          |
| Diabetic                                    | 18 (52.9%)                 | 7 (41.2%)                    |          |
| <b>Waist circumference (cm)</b>             | 109.5 (89.0-142.0) - 102.6 | 120.2 (79.0-151.0) - 120.6   | 0.233    |
| <b>NFS</b>                                  | 1.1 (-3.0-4.6) - 1.2       | 1.6 (-2.0-4.7) - 1.2         | 0.568    |
| <b>Drinks per week</b>                      | 4.9 (0.0-42.0) - 0.0       | 3.9 (0.0-42.8) - 0.0         | 0.748    |
| <b>Drinking status</b>                      |                            |                              | 0.029    |
| Never                                       | 25 (73.5%)                 | 11 (78.6%)                   |          |
| Moderate                                    | 6 (17.6%)                  | 1 (7.1%)                     |          |
| Heavy                                       | 3 (8.8%)                   | 2 (14.3%)                    |          |
| <b>Smoking status</b>                       |                            |                              | 0.131    |
| Never                                       | 20 (58.8%)                 | 11 (68.8%)                   |          |
| Former                                      | 9 (26.5%)                  | 1 (6.3%)                     |          |
| Current                                     | 5 (14.7%)                  | 4 (25.0%)                    |          |
| <b>Blood tests</b>                          |                            |                              |          |
| AST (U/L)                                   | 89.3 (38.0-258.0) - 73.1   | 94.5 (18.0-289.0) - 57.9     | 0.834    |
| Abnormal AST (>33 U/L)                      | 34 (100.0%)                | 16 (94.1%)                   | NA       |
| ALT (U/L)                                   | 90.7 (24.0-366.0) - 72.5   | 112.5 (13.0-323.0) - 64.8    | 0.496    |
| Abnormal ALT (>40 U/L male, >31 U/L female) | 32 (94.1%)                 | 13 (76.5%)                   | 0.009    |
| Albumin (g/dL)                              | 3.7 (2.5-4.5) - 3.8        | 3.8 (3.2-4.5) - 3.7          | 0.775    |
| Alkaline phosphatase (U/L)                  | 56.6 (4.0-207.0) - 16.7    | 84.7 (4.0-477.0) - 11.3      | 0.530    |
| FBG (mg/dL)                                 | 149.5 (54.0-359.0) - 124.8 | 141.8 (86.0-327.0) - 116.6   | 0.792    |
| Insulin (mU/L)                              | 20.1 (4.2-279.0) - 12.8    | 39.6 (4.6-76.5) - 28.7       | 0.557    |
| Insulin resistance (HOMA)                   | 7.3 (1.2-104.7) - 3.5      | 14.8 (1.2-41.7) - 9.1        | 0.487    |
| Platelet counts (×10 <sup>9</sup> /L)       | 135.5 (10.0-238.0) - 141.6 | 149.7 (41.0-292.0) - 138.2   | 0.623    |
| cfDNA concentrations                        | 0.05 (0.02-0.12) - 0.03    | 0.08 (0.01-0.98) - 0.04      | 0.423    |
