# Supplementary material for: Somatic Mutations in Circulating Cell-Free DNA and Risk for Hepatocellular Carcinoma in Hispanics
Source: Int J Mol Sci. 2021 Jul 10;22(14):7411. doi: 10.3390/ijms22147411 (PMC8304329; doi:10.3390/ijms22147411)
Supplement: Supplementary file 1 [file ijms-22-07411-s001.zip]

Archive with 6 entries (6 files):
- Supplementary Table  S2 Final.pdf
- Supplementary Table  S3 Final.pdf
- Supplementary Table  S4 Final.pdf
- Supplementary Table S1 Final.pdf
- Supplementary Table S5 Final.pdf
- Supplementary Table S6 Final.pdf
